# Supplementary material for: Is electrochemical CO2 reduction the future technology for power-to-chemicals? An environmental comparison with H2-based pathways
Source: Royal Society of Chemistry journal article supplement (doi:10.1039/d1se00975c), 2021-01-01
Supplement: d1se00975c2.xlsx [file d1se00975c2.xlsx]

## Sheet: eCO2R literature review
								CO	H2	C2H4	CH3OH	SUM
	Author	Setup	Cathode Potential	Anode Potential	Cell Voltage	Current Density	CO2 conversion	Faradaic Efficiency	Faradaic Efficiency	Faradaic Efficiency	Faradaic Efficiency	Faradaic Efficiency
			[V] vs RHE/SHE	[V] vs RHE/SHE	[V]	mA/cm^2	[%]	[%]	[%]	[%]	[%]	[%]
	Kuhl (2012)		-1.17176	1,23*	2.40176	16.5684	0.431539	0.40678	51.661	9.62712		61.6949
	Kuhl (2012)		-1.13944	1,23*	2.36944	12.2304	0.411869	0.135593	32.9492	15.322		48.4068
	Kuhl (2012)		-1.09757	1,23*	2.32757	9.19635	0.340751	0.40678	22.6441	21.2881		44.339
	Kuhl (2012)		-1.0542	1,23*	2.2842	5.85053	0.246286	1.22034	22.6441	25.8983		49.7627
	Kuhl (2012)		-1.01407	1,23*	2.24407	3.52521	0.233432	3.9322	25.8983	17.4915		47.322
	Kuhl (2012)		-0.956289	1,23*	2.18629	1.82324	0.148534	6.91525	30.7797	10.4407		48.1356
	Kuhl (2012)		-0.890493	1,23*	2.12049	1.17004	0.118919	8.54237	37.5593	3.66102		49.7627
	Kuhl (2012)		-0.818267	1,23*	2.04827	0.885307	0.0821718	8	43.7966	1.76271		53.5593
	Kuhl (2012)		-0.747761	1,23*	1.97776	0.487167	0.041568	11.7966	61.4237	0.40678		73.6271
	Kuhl (2012)		-0.677226	1,23*	1.90723	0.315756	0.0191897	18.5763	76.0678			94.6441
	Wang (2018)		-0.809398	1,23*	2.0394	10.1463			96.962	1.26582		98.2278
	Wang (2018)		-0.775564	1,23*	2.00556	3.64427			77.7215	13.6709		91.3924
	Wang (2018)		-0.729699	1,23*	1.9597	2.08489			64.3038	27.3418		91.6456
	Wang (2018)		-0.681579	1,23*	1.91158	1.3219			46.3291	35.443		81.7722
	Wang (2018)		-0.632707	1,23*	1.86271	1.02963			36.2025	37.7215		73.9241
	Wang (2018)		-0.583083	1,23*	1.81308	0.932291			47.8481	25.8228		73.6709
	Wang (2018)		-0.533459	1,23*	1.76346	0.58167			53.9241	16.962		70.8861
	Wang (2018)		-0.485338	1,23*	1.71534	0.308437			55.443	10.1266		65.5696
	Wang (2018)		-0.435714	1,23*	1.66571	0.133535			51.8987	4.3038		56.2025
	Hori (1989)		-1.41	1,23*	2.64	5		2	10.9	30.1		43
	Hori (1989)		-1.44	1,23*	2.67	5		2.5	5.9	47.8		56.2
	Hori (1989)		-1.39	1,23*	2.62	5		3	12.5	38.2		53.7
	Hori (1989)		-1.4	1,23*	2.63	5		2.4	6.7	48.1		57.2
	Hori (1989)		-1.4	1,23*	2.63	5		2.1	8.7	46		56.8
	Hori (1989)		-1.23	1,23*	2.46	5		1.3	72.4	1.8		75.5
	Hori (1989)		-1.17	1,23*	2.4	5		1	83.3	1		85.3
	Hori (1989)		-0.813356	1,23*	2.04336	0.11389		0.997566	91.4068			92.4044
	Hori (1989)		-0.917735	1,23*	2.14774	0.462183		2.68273	89.5817			92.2645
	Hori (1989)		-0.990957	1,23*	2.22096	0.689639		4.36539	89.8859			94.2513
	Hori (1989)		-1.0353	1,23*	2.2653	1.00865		5.43466	82.8897			88.3244
	Hori (1989)		-1.06871	1,23*	2.29871	0.988664		5.89576	79.8479			85.7437
	Hori (1989)		-1.12013	1,23*	2.35013	0.747108		11.0729	62.2053	0.88287		74.1611
	Hori (1989)		-1.16564	1,23*	2.39564	0.689639		16.25	52.4715	2.71377		71.4353
	Hori (1989)		-1.18849	1,23*	2.41849	0.747108		16.405	50.038	3.47789		69.9209
	Hori (1989)		-1.21888	1,23*	2.44888	0.762209		19.2986	45.4753	5.76295		70.5368
	Hori (1989)		-1.26459	1,23*	2.49459	0.912615		19.9124	37.5665	8.50601		65.9849
	Hori (1989)		-1.33182	1,23*	2.56182	1.50504		11.0993	29.0494	20.2252		60.374
	Hori (1989)		-1.36424	1,23*	2.59424	2.9718		5.17231	22.6616	21.9025		49.7364
	Hori (1989)		-1.40293	1,23*	2.63293	7.46067		2.13604	10.4943	24.1893		36.8196
	Hori (1989)		-1.44996	1,23*	2.67996	6.88678		1.98993	12.9278	23.1306		38.0483
	Aeshala (2014)	PEI/PVA/KOH			1.8	2.42	0.0158596	0.0853959	23.3955		3.25473	26.7357
	Aeshala (2014)	PEI/PVA/KOH			2	3.53	0.0161431	0.0334682	50.6458		1.77281	52.452
	Aeshala (2014)	PEI/PVA/KOH			2.25	4.1	0.0320532	0.0268099	44.2849		1.52027	45.832
	Aeshala (2014)	PEI/PVA/KOH			2.5	4.49	0.0472188	0.132217	50.1832		1.98537	52.3008
	Aeshala (2014)	PEI/PVA/KOH			2.75	4.89	0.0415174	0.0107321	43.6187		1.06339	44.6928
	Aeshala (2014)	PEI/PVA/KOH			3	5.82	0.0272461	0.254154	50.007		1.05831	51.3195
	Aeshala (2014)	QPEI/PVA/KOH SPEs			1.8	1.42069	0.0169689	0.287117	17.8162		5.36688	23.4702
	Aeshala (2014)	QPEI/PVA/KOH SPEs			2	1.78315	0.0236709		20.2398		2.21716	22.4569
	Aeshala (2014)	QPEI/PVA/KOH SPEs			2.25	1.80997	0.0446324	0.104015	16.8859		2.18431	19.1742
	Aeshala (2014)	QPEI/PVA/KOH SPEs			2.5	3.05326	0.0283765	0.0102766	25.8926		1.26403	27.1669
	Aeshala (2014)	QPEI/PVA/KOH SPEs			2.75	3.43449	0.0295173		34.3945		2.22003	36.6145
	Aeshala (2014)	QPEI/PVA/KOH SPEs			3	4.81187	0.0195356	0.0065208	41.4154		1.58455	43.0065
	Vennekoetter (2019)	Setup b), Ag	-1.09946	2.76831	3.86777	10	0.788261	46.832	44.0771			90.9091
	Vennekoetter (2019)	Setup b), Ag	-1.15691	3.34723	4.50413	20	1.27976	38.0165	57.3003			95.3168
	Vennekoetter (2019)	Setup b), Ag	-1.16199	3.89586	5.05785	30	1.47451	29.2011	65.8402			95.0413
	Vennekoetter (2019)	Setup b), Ag	-1.17453	4.87506	6.04959	50	1.15921	13.7741	81.5427			95.3168
	Vennekoetter (2019)	Setup b), Ag	-1.18469	5.83184	7.01653	70	1.16848	9.91736	89.5317			99.449
	Vennekoetter (2019)	Setup b), Ag	-1.20944	7.08808	8.29752	100	0.463683	2.75482	94.2149			96.9697
	Vennekoetter (2019)	Setup c), Ag	-0.904762	1,23*	2.13476	10	0.87617	52.0548	47.6712			99.726
	Vennekoetter (2019)	Setup c), Ag	-0.969048	1,23*	2.19905	20	1.40187	41.6438	49.863			91.5068
	Vennekoetter (2019)	Setup c), Ag	-0.978571	1,23*	2.20857	30	1.79845	35.6164	63.0137			98.6301
	Vennekoetter (2019)	Setup c), Ag	-0.988095	1,23*	2.2181	50	2.12125	25.2055	70.6849			95.8904
	Vennekoetter (2019)	Setup c), Ag	-0.988095	1,23*	2.2181	70	1.48488	12.6027	80			92.6027
	Vennekoetter (2019)	Setup c), Ag	-0.992857	1,23*	2.22286	100	1.2912	7.67123	89.863			97.5342
	Vennekoetter (2019)	Setup c), Cu	-0.745238	1,23*	1.97524	10	0.885393	52.0548	20.274	1.64384		73.9726
	Vennekoetter (2019)	Setup c), Cu	-0.740476	1,23*	1.97048	20	1.02681	30.137	48.7671	1.09589		80
	Vennekoetter (2019)	Setup c), Cu	-0.788095	1,23*	2.0181	30	1.04218	20.274	58.0822	1.09589		79.4521
	Vennekoetter (2019)	Setup c), Cu	-0.854762	1,23*	2.08476	50	1.10674	11.5068	70.6849	4.93151		87.1233
	Vennekoetter (2019)	Setup c), Cu	-0.883333	1,23*	2.11333	70	1.11904	7.12329	80.5479	7.12329		94.7945
	Vennekoetter (2019)	Setup c), Cu	-0.904762	1,23*	2.13476	100	1.35268	4.93151	89.863	9.31507		104.11
	Vennekoetter (2019)	Setup d), Ag	-0.728571	1,23*	1.95857	10	1.53873	91.4187	2.28374			93.7024
	Vennekoetter (2019)	Setup d), Ag	-0.780952	1,23*	2.01095	20	3.18928	94.7405	0.622837			95.3633
	Vennekoetter (2019)	Setup d), Ag	-0.819048	1,23*	2.04905	30	4.6721	92.526	1.7301			94.2561
	Vennekoetter (2019)	Setup d), Ag	-0.92381	1,23*	2.15381	50	8.20617	97.5087	3.391			100.9
	Vennekoetter (2019)	Setup d), Ag	-0.990476	1,23*	2.22048	70	10.3797	88.0969	10.5882			98.6851
	Vennekoetter (2019)	Setup d), Ag	-1.07143	1,23*	2.30143	100	8.58474	51.0035	48.2353			99.2388
	Vennekoetter (2019)	Setup d), Cu	-0.652381	1,23*	1.88238	10	0.795962	47.128	18.8927	0.484429		66.5052
	Vennekoetter (2019)	Setup d), Cu	-0.719048	1,23*	1.94905	20	2.14017	62.6298	10.5882	2.83737		76.0554
	Vennekoetter (2019)	Setup d), Cu	-0.747619	1,23*	1.97762	30	3.4339	65.9516	6.7128	6.15917		78.8235
	Vennekoetter (2019)	Setup d), Cu	-0.766667	1,23*	1.99667	50	5.2417	57.6471	7.82007	13.91		79.3772
	Vennekoetter (2019)	Setup d), Cu	-0.82381	1,23*	2.05381	70	6.59911	48.7889	9.48097	21.6609		79.9308
	Vennekoetter (2019)	Setup d), Cu	-0.852381	1,23*	2.08238	100	8.89924	41.5917	13.3564	33.8408		88.7889
	Vennekoetter (2019)	Setup e) 1, Ag	-0.787805	1,23*	2.0178	10	1.51896	90.2439	1.0453			91.2892
	Vennekoetter (2019)	Setup e) 1, Ag	-0.841463	1,23*	2.07146	20	3.16928	94.1463	1.0453			95.1916
	Vennekoetter (2019)	Setup e) 1, Ag	-0.880488	1,23*	2.11049	30	4.78208	94.7038	1.60279			96.3066
	Vennekoetter (2019)	Setup e) 1, Ag	-0.94878	1,23*	2.17878	50	8.1578	96.9338	2.16028			99.0941
	Vennekoetter (2019)	Setup e) 1, Ag	-1.05122	1,23*	2.28122	70	10.567	89.6864	5.50523			95.1916
	Vennekoetter (2019)	Setup e) 1, Ag	-1.23659	1,23*	2.46659	100	9.84096	58.4669	44.5296			102.997
	Vennekoetter (2019)	Setup e) 1, Cu	-0.739024	1,23*	1.96902	10	0.975104	57.9094	12.7526	0.0696864		70.7317
	Vennekoetter (2019)	Setup e) 1, Cu	-0.812195	1,23*	2.0422	20	2.3928	69.0592	8.29268	6.06272		83.4146
	Vennekoetter (2019)	Setup e) 1, Cu	-0.841463	1,23*	2.07146	30	2.99803	56.2369	7.73519	9.40767		73.3798
	Vennekoetter (2019)	Setup e) 1, Cu	-0.92439	1,23*	2.15439	50	4.62138	47.8746	7.73519	21.115		76.7247
	Vennekoetter (2019)	Setup e) 1, Cu	-0.953659	1,23*	2.18366	70	5.7693	37.8397	8.85017	33.3798		80.0697
	Vennekoetter (2019)	Setup e) 1, Cu	-1.0122	1,23*	2.2422	100	7.20967	28.3624	8.29268	43.4146		80.0697
	Vennekoetter (2019)	Setup e) 1, Cu	-1.03321	1,23*	2.26321	200	14.9824	23.9024	8.85017	61.8118		94.5645
	Vennekoetter (2019)	Setup e) 1, Cu	-1.05978	1,23*	2.28978	300	18.3448	4.94774	9.96516	94.1463		109.059
	Vennekoetter (2019)	Setup e) 2, Ag	-0.904878	1,23*	2.13488	10	1.60379	95.2841	1.76123			97.0454
	Vennekoetter (2019)	Setup e) 2, Ag	-0.958537	1,23*	2.18854	20	3.24641	96.4376	2.91643			99.354
	Vennekoetter (2019)	Setup e) 2, Ag	-0.992683	1,23*	2.22268	30	4.92705	97.575	3.49225			101.067
	Vennekoetter (2019)	Setup e) 2, Ag	-1.02195	1,23*	2.25195	50	8.07116	95.9044	5.76532			101.67
	Vennekoetter (2019)	Setup e) 2, Ag	-1.11951	1,23*	2.34951	70	11.5038	97.6372	7.49633			105.134
	Vennekoetter (2019)	Setup e) 2, Ag	-1.19268	1,23*	2.42268	100	15.9655	94.854	9.22024			104.074
	Vennekoetter (2019)	Setup e) 2, Ag	-1.23375	1,23*	2.46375	200	25.6797	76.2838	31.7768			108.061
	Vennekoetter (2019)	Setup e) 2, Ag	-1.27539	1,23*	2.50539	300	28.2882	56.0217	49.8245			105.846
	Vennekoetter (2019)	Setup e) 2, Cu	-0.680488	1,23*	1.91049	10	0.957338	56.8659	29.262	0.0337673		86.1616
	Vennekoetter (2019)	Setup e) 2, Cu	-0.714634	1,23*	1.94463	20	1.60491	47.3062	33.7833	1.10721		82.1966
	Vennekoetter (2019)	Setup e) 2, Cu	-0.734146	1,23*	1.96415	30	1.93395	37.7394	33.7939	1.68125		73.2146
	Vennekoetter (2019)	Setup e) 2, Cu	-0.821951	1,23*	2.05195	50	4.39746	50.738	20.3172	4.54259		75.5978
	Vennekoetter (2019)	Setup e) 2, Cu	-0.856098	1,23*	2.0861	70	5.25165	42.3033	19.7663	6.80855		68.8781
	Vennekoetter (2019)	Setup e) 2, Cu	-0.909756	1,23*	2.13976	100	6.11735	33.3141	16.9778	9.09051		59.3824
	Vennekoetter (2019)	Setup f), Ag	-0.65122	1.86118	2.5124	10	1.16527	69.2308	21.6783			90.9091
	Vennekoetter (2019)	Setup f), Ag	-0.704878	1.95628	2.66116	20	2.61303	77.6224	16.0839			93.7063
	Vennekoetter (2019)	Setup f), Ag	-0.807317	1.95301	2.76033	30	3.97604	78.7413	14.965			93.7063
	Vennekoetter (2019)	Setup f), Ag	-0.953659	2.01328	2.96694	50	6.39133	75.9441	16.6434			92.5874
	Vennekoetter (2019)	Setup f), Ag	-1.09512	2.02058	3.1157	70	8.42055	71.4685	22.7972			94.2657
	Vennekoetter (2019)	Setup f), Ag	-1.16341	2.09278	3.2562	100	9.20446	54.6853	37.3427			92.028
	Vennekoetter (2019)	Setup f), Cu	-0.739024	1,23*	1.96902	10	1.14879	68.1119	28.951	0.41958		97.4825
	Vennekoetter (2019)	Setup f), Cu	-0.812195	1,23*	2.0422	20	2.48591	73.7063	23.3566	0.41958		97.4825
	Vennekoetter (2019)	Setup f), Cu	-0.841463	1,23*	2.07146	30	3.88894	74.8252	22.7972	6.57343		104.196
	Vennekoetter (2019)	Setup f), Cu	-0.92439	1,23*	2.15439	50	6.23047	70.9091	23.3566	9.37063		103.636
	Vennekoetter (2019)	Setup f), Cu	-0.958537	1,23*	2.18854	70	8.19534	65.8741	25.035	11.049		101.958
	Vennekoetter (2019)	Setup f), Cu	-1.01707	1,23*	2.24707	100	10.0441	54.6853	30.0699	14.965		99.7203
	Dufek (2010)		-2.3703	2.97473	5.34503	90	8.66277	25.4158	75.316			100.732
	Dufek (2010)		-2.18357	2.26627	4.44984	70	10.7239	40.4524	60.4125			100.865
	Dufek (2010)		-1.95367	1.84358	3.79725	50	14.2616	75.316	25.4158			100.732
	Dufek (2010)		-1.72342	1.27904	3.00246	30	9.91759	87.2921	13.1737			100.466
	Dufek (2010)		-1.60693	1.02805	2.63499	20	6.61173	87.2921	13.3067			100.599
	Dufek (2010)		-1.43281	0.721514	2.15432	10	3.30586	87.2921	13.3067			100.599
	Delacourt (2007)		-1.99401	2.51153	4.51476	100	0.905568	23.9117	72.4922			96.4039
	Delacourt (2007)		-1.72832	2.06872	3.78413	75	0.961867	33.8644	62.3817			96.2462
	Delacourt (2007)		-1.49585	1.91374	3.40775	50	1.20722	63.754	32.0821			95.8361
	Delacourt (2007)		-1.23017	1.62592	2.85424	20	0.626107	82.6625	9.60251			92.265
	Delacourt (2007)		-1.14161	1.54843	2.67712	10	0.292003	77.1041	9.97482			87.0789
	Delacourt (2007)		-1.07519	1.49308	2.59963	5	0.137633	72.6845	13.2523			85.9368
	Delacourt (2007)		-0.743085	1.41559	2.1679	1						0
	Delacourt (2007)		-1.99401	2.51153	4.51476	100						0
	Delacourt (2007)		-1.72832	2.06872	3.78413	75	1.00129	35.2524	64.5269			99.7793
	Delacourt (2007)		-1.49585	1.91374	3.40775	50	1.16661	61.609	35.2368			96.8457
	Delacourt (2007)		-1.23017	1.62592	2.85424	20	0.502816	66.3848	24.9967			91.3815
	Delacourt (2007)		-1.14161	1.54843	2.67712	10	0.269066	71.0474	14.5174			85.5648
	Delacourt (2007)		-1.07519	1.49308	2.59963	5	0.131182	69.2776	11.7381			81.0157
	Delacourt (2007)		-0.743085	1.41559	2.1679	1						0
	Delacourt (2007)		-1.99401	2.51153	4.51476	100						0
	Delacourt (2007)		-1.72832	2.06872	3.78413	75	1.02279	36.0095	62.6341			98.6436
	Delacourt (2007)		-1.49585	1.91374	3.40775	50	1.06147	56.0569	39.0222			95.0791
	Delacourt (2007)		-1.23017	1.62592	2.85424	20	0.492303	64.9968	30.0442			95.041
	Delacourt (2007)		-1.14161	1.54843	2.67712	10	0.224623	59.3123	25.9999			85.3122
	Delacourt (2007)		-1.07519	1.49308	2.59963	5	0.126881	67.0063	12.6214			79.6278
	Delacourt (2007)		-0.743085	1.41559	2.1679	1						0
	Jhong (2013)		-1.4718	1.52772	2.99952	91.215	18.5321	93.883	0			93.883
	Jhong (2013)		-1.34996	1.40772	2.75768	36.8546	7.61502	95.4787	0.398936			95.8777
	Jhong (2013)		-1.16722	1.33422	2.50144	6.93983	1.30412	86.8351	0.132979			86.9681
	Jhong (2013)		-0.959332	1.29163	2.25096	0.725209	0.0413221	26.3298	6.64894			32.9787
	Jhong (2013)		-0.731259	1.27498	2.00624	0.0201395	5.79567e-06	0.132979	0			0.132979
	Jhong (2013)		-1.51115	1.48837	2.99952	94.1427	16.7699	82.3138	2.65957			84.9734
	Jhong (2013)		-1.34944	1.3996	2.74904	30.2942	5.43127	82.8457	3.45745			86.3032
	Jhong (2013)		-1.17377	1.32767	2.50144	6.58058	1.12298	78.8564	4.3883			83.2447
	Jhong (2013)		-0.967141	1.2867	2.25384	0.738635	0.0391113	24.4681	20.6117			45.0798
	Jhong (2013)		-0.725862	1.27174	1.9976	0.264113	0.000228016	0.398936	0			0.398936
	MIN		-2.3703	0.721514	1.66571	0.0201395	5.79567e-06	0.0065208	0	0.0337673	1.05831	0
	MAX		-0.435714	7.08808	8.29752	300	28.2882	97.6372	96.962	94.1463	5.36688	109.059
	AVERAGE		-1.0661	2.06445	2.56023	35.0662	3.87943	42.3648	33.0208	15.7866	2.12432	76.7974
