# Supplementary material for: Is electrochemical CO2 reduction the future technology for power-to-chemicals? An environmental comparison with H2-based pathways
Source: Royal Society of Chemistry journal article supplement (doi:10.1039/d1se00975c), 2021-01-01
Supplement: d1se00975c3.xlsx [file d1se00975c3.xlsx]

## Sheet: process inventory
			Author	Deutz	Bareiß	Sternberg	Adnan	Rikho-Struckmann	Dimian
			source	https://doi.org/10.1038/s41560-020-00771-9	https://doi.org/10.1016/j.apenergy.2019.01.001	https://doi.org/10.1039/C6GC02852G	https://doi.org/10.1016/j.apenergy.2020.115614	https://doi.org/10.1021/ie100508w	https://doi.org/10.1016/j.cherd.2017.11.009
technosphere flow	unit	carbon content [kg C]	energy content (MJ) https://www.engineeringtoolbox.com/heating-values-fuel-gases-d_823.html	Direct Air Capture (Deutz)	H2 PEM Electrolyser	reserve water gas shift (electrical heating)	Syngas-to-Methanol (CO-based) (Adnan)	CO2-based methanol (Rihko-Struckmann)	Methanol-to-Ethylene MTO (LHV allocated)	heat from electricity	cooling energy from compression chiller (COP 2.5)	excess heat: no avoided burden	methanol end-of-life	ethylene end-of-life
electricity, medium voltage	kWh	0	3.6	-2.00556	-55.7	-1.54		-1.33	-0.145591	-1	-0.111111
heat demand	MJ	0	1			-2.556				3.6
excess heat	MJ	0	1						0.651857			-1
cooling energy	MJ	0	0						-2.63386		1
water, deionised	kg	0	0		-8.94
carbon dioxide, in chemical industry	kg	0.272727	0	1		-1.581	-0.692263	-1.437
hydrogen, gaseous	kg	0	120		1	-0.072	-0.157323	-0.196
carbon monoxide	kg	0.428571	10.16			1	-0.440525
methanol	kg	0.375	19.9				1	1	-2.44691				-1
ethylene	kg	0.857143	47.74						1					-1
elementary flow	unit	carbon content [kg C]
Carbon dioxide, fossil	kg	0.272727		-1		0.01	0.00951676	0.062	0.221645				1.375	3.14286
Hydrogen	kg	0					0.00103304
Carbon monoxide, fossil	kg	0.428571					8.60863e-05
	energy balance		input [MJ]	-7.22	-200.52	-16.74	-23.3545	-28.308	-49.2177	-3.6	-0.4	-1	-19.9	-47.74
			output [MJ]	0	120	10.16	19.9	19.9	48.3919	3.6	0	0	0	0
			energy efficiency	0	0.598444	0.60693	0.852086	0.702981	0.983221	1	0	0	0	0
	carbon balance	input technosphere [kg C]		0	0	-0.431182	-0.377595	-0.391909	-0.917592	0	0	0	-0.375	-0.857143
		input environment [kg C]		-0.272727	0	0	0	0	0	0	0	0	0	0
		output technosphere [kg C]		0.272727	0	0.428571	0.375	0.375	0.857143	0	0	0	0	0
		output environment [kg C]		0	0	0.00272727	0.00263238	0.0169091	0.0604486	0	0	0	0.375	0.857143
		balance		0	#DIV/0!	0.000271076	9.77081e-05	8.85268e-17	-1.4466e-07	#DIV/0!	#DIV/0!	#DIV/0!	0	0
